# Supplementary material for: Determinants of breastfeeding practices in Myanmar: Results from the latest nationally representative survey
Source: PubMed Central journal article supplement (PMC7514058; doi:10.1371/journal.pone.0239515), 2020-09-24
Supplement: pone.0239515.s001.pdf [file pone.0239515.s001.pdf]

**S1 Table. Crude/unadjusted odds ratios from simple logistic regressions of EIBF and EBF**

| Variables                                          | EIBF [n=1,506]        | EBF [n=376]           |
|----------------------------------------------------|-----------------------|-----------------------|
|                                                    | COR<br>[95%CI]        | COR<br>[95%CI]        |
| <b>Bio-demographic factors</b>                     |                       |                       |
| Child's age (months) (0-1 = base category)         |                       |                       |
| 2-3                                                |                       | 0.4**<br>[0.2 - 0.8]  |
| 4-5                                                |                       | 0.2***<br>[0.1 - 0.5] |
| Sex of child (Female)                              | 1.2<br>[0.9 - 1.5]    | 2.5***<br>[1.6 - 3.9] |
| Mother's age (years) (15-19 = base category)       |                       |                       |
| 20-34                                              | 0.7<br>[0.4 - 1.4]    | 0.9<br>[0.3 - 2.5]    |
| 35-49                                              | 0.7<br>[0.4 - 1.5]    | 0.8<br>[0.3 - 2.6]    |
| Perception of birth size (Small = base category)   |                       |                       |
| Average                                            | 1.5*<br>[1.0 - 2.1]   | 2.9**<br>[1.6 - 5.7]  |
| Large                                              | 1.2<br>[0.8 - 1.8]    | 2.7**<br>[1.3 - 5.5]  |
| Birth order (1 <sup>st</sup> rank = base category) |                       |                       |
| 2 <sup>nd</sup> - 4 <sup>th</sup> rank             | 1.5**<br>[1.1 - 1.9]  | 1.1<br>[0.7 - 1.8]    |
| >=5 <sup>th</sup> rank                             | 1.2<br>[0.8 - 1.8]    | 0.9<br>[0.4 - 1.9]    |
| Place of residence (Rural)                         | 0.8<br>[0.6 - 1.1]    | 0.9<br>[0.5 - 1.6]    |
| Region of residence (Hilly = base category)        |                       |                       |
| Coastal                                            | 0.3***<br>[0.2 - 0.5] | 0.5<br>[0.3 - 1.1]    |
| Delta                                              | 0.8<br>[0.6 - 1.2]    | 1.1<br>[0.6 - 2.0]    |
| Dry                                                | 0.9<br>[0.7 - 1.4]    | 0.9<br>[0.5 - 1.7]    |
| <b>Socio-economic factors</b>                      |                       |                       |
| Mother's education (No education = base category)  |                       |                       |
| Primary                                            | 0.9<br>[0.6 - 1.3]    | 1.2<br>[0.6 - 2.4]    |
| Secondary                                          | 0.9<br>[0.6 - 1.3]    | 1.4<br>[0.7 - 2.9]    |
| > Secondary                                        | 0.7                   | 2.1                   |

|                                           |                       |                      |
|-------------------------------------------|-----------------------|----------------------|
|                                           | [0.4 - 1.2]           | [0.8 - 5.6]          |
| Mother's occupation<br>(Working)          | 0.9<br>[0.7 - 1.2]    | 1.2<br>[0.7 - 1.9]   |
| Economic status (Poorest = base category) |                       |                      |
| Poorer                                    | 0.9<br>[0.6 - 1.2]    | 0.6<br>[0.3 - 1.2]   |
| Middle                                    | 1.2<br>[0.8 - 1.8]    | 1.1<br>[0.5 - 2.2]   |
| Richer                                    | 1.4<br>[0.9 - 1.7]    | 0.9<br>[0.4 - 1.8]   |
| Richest                                   | 1.3<br>[0.9 - 1.9]    | 1.4<br>[0.7 - 2.9]   |
| <b>Behavioral factors</b>                 |                       |                      |
| ANC visits (None = base category)         |                       |                      |
| 1 - 3                                     | 1.4<br>[0.9 - 2.2]    | 1.1<br>[0.4 - 2.2]   |
| 4 and above                               | 1.8**<br>[1.2 - 2.6]  | 1.6<br>[0.8 - 3.3]   |
| Mode of delivery (Vaginal<br>delivery)    | 1.9***<br>[1.4 - 2.6] | 0.8<br>[0.5 - 1.4]   |
| Place of delivery (Health<br>facility)    | 0.9<br>[0.7 - 1.1]    | 1.1<br>[0.7 - 1.7]   |
| Postnatal checkup (Yes)                   |                       | 0.5**<br>[0.3 - 0.8] |

Notes: (1) COR = crude odds ratios;

(2) \*p < 0.05, \*\*p < 0.01, \*\*\*p < 0.001;

(3) Robust standard errors were used in the calculation of the 95% CIs;

(4) Sampling weights were accounted for in the estimation.
